# Supplementary material for: Metabolites and Biological Activities of Thymus zygis, Thymus pulegioides, and Thymus fragrantissimus Grown under Organic Cultivation
Source: PubMed Central journal article supplement (PMC6099726; doi:10.3390/molecules23071514), 2018-06-22
Supplement: molecules-23-01514-s001.pdf [file molecules-23-01514-s001.pdf]

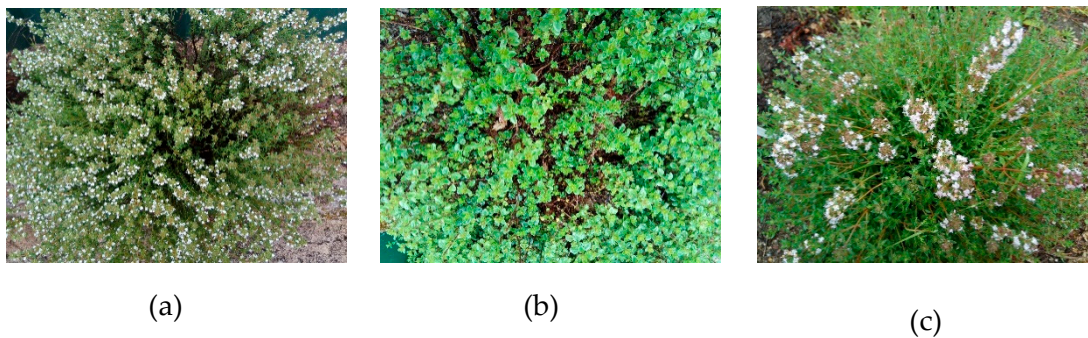

**Figure S1.** Pictures of *Thymus zygis* (a), *Thymus pulegioides* (b) and *Thymus fragrantissimus* (c). Numbers in the figure correspond to the UHPLC-DAD-ESI-MS<sup>n</sup> peaks described in Table 3.

**Table S1.** Linearity, LOD and LOQ of the standard compounds used as references.

| Standard Compound | Regression Equation  | R <sup>2</sup> | Range concentration (µg/mL) | LOD (µg/mL) | LOQ (µg/mL) |
|-------------------|----------------------|----------------|-----------------------------|-------------|-------------|
| A-7O-G            | $y = 2E+07x - 4108$  | 0.9994         | 1 - 50                      | 2.1         | 6.3         |
| E-7O-G            | $y = 1E+07x + 416$   | 0.9997         | 1 - 100                     | 3.1         | 9.2         |
| L-7O-G            | $y = 2E+07x - 7697$  | 0.9996         | 1 - 50                      | 1.6         | 4.9         |
| RA                | $y = 2E+07x - 67279$ | 0.9970         | 26 - 517                    | 52.1        | 158.0       |

LOD and LOQ were defined as 3.3 and 10 times the value of the regression error divided by the slope, respectively; L-7O-G: luteolin-7-*O*-glucoside; RA: rosmarinic acid; A-7O-G: apigenin-7-*O*-glucoside; E-7O-G: eriodictyol-7-*O*-glucoside; Injections were done in triplicate.

Rosmarinic acid (26)

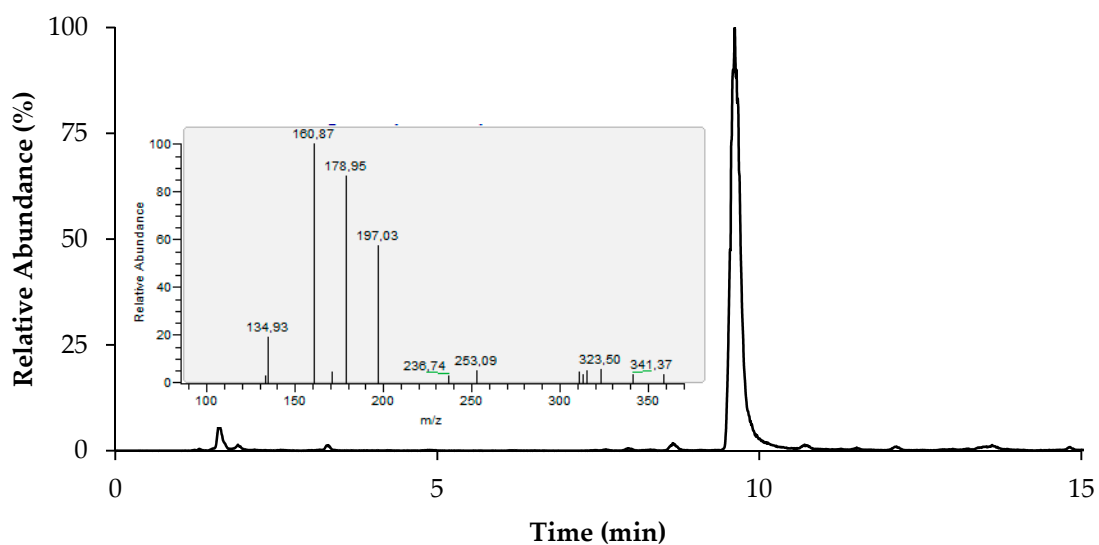

Caffeoyl rosmarinic acid (29)

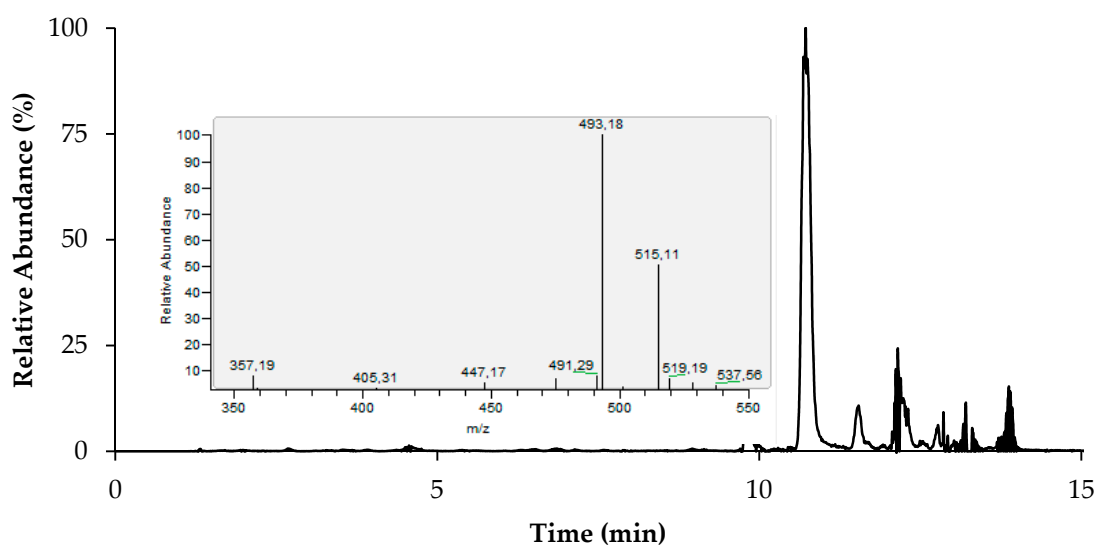

Luteolin-C-glucoside (12)

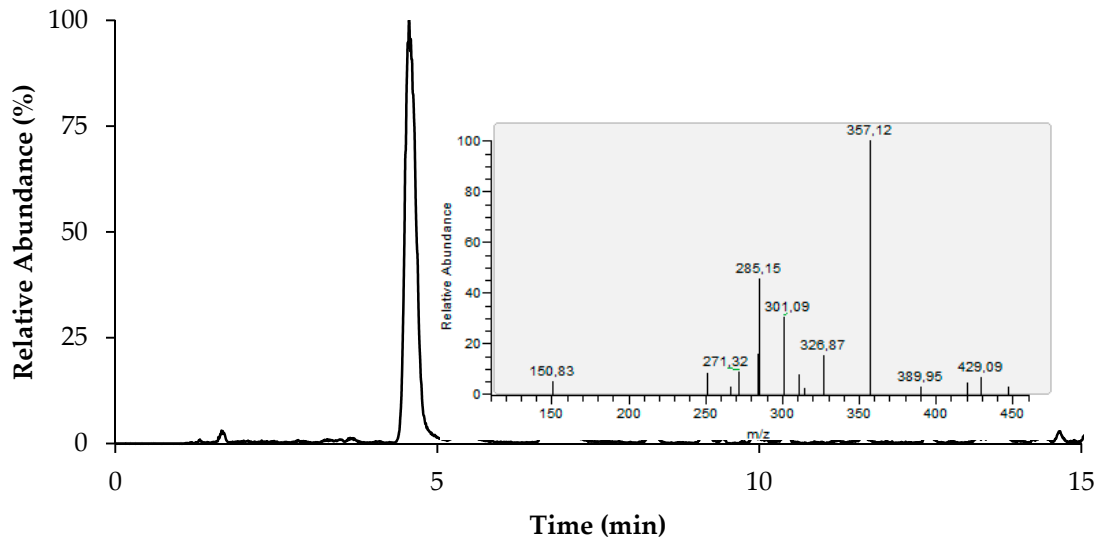

Luteolin-*O*-glucuronide (17)

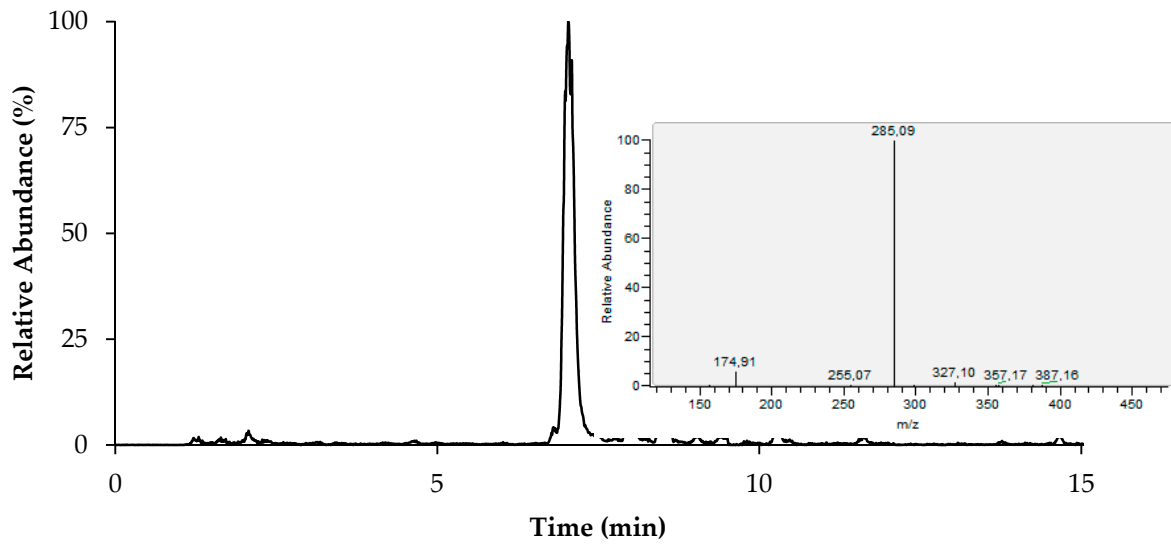

Apigenin-*O*-glucuronide (25)

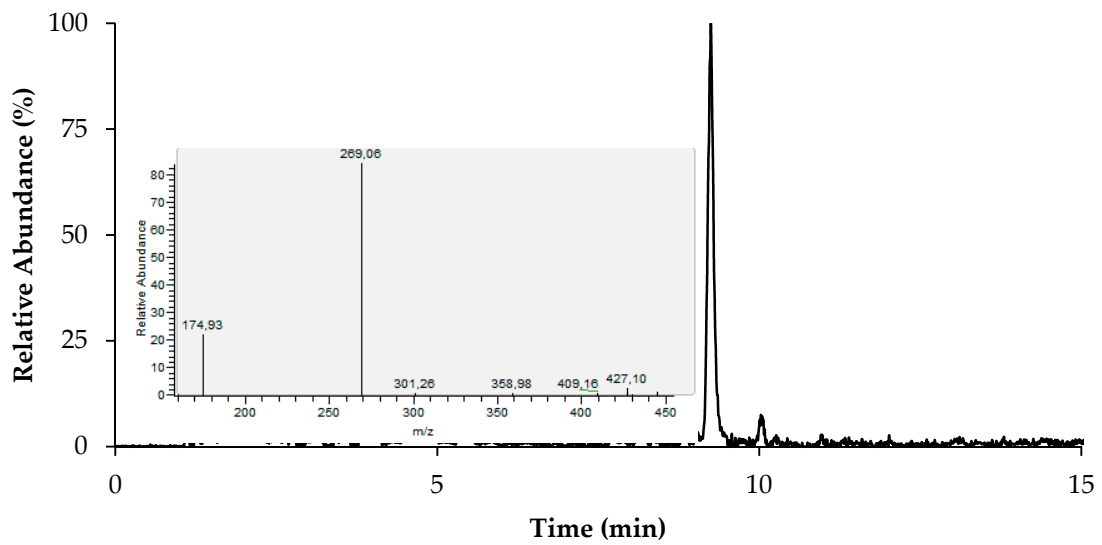

Eriodictyol-*O*-hexoside (9)

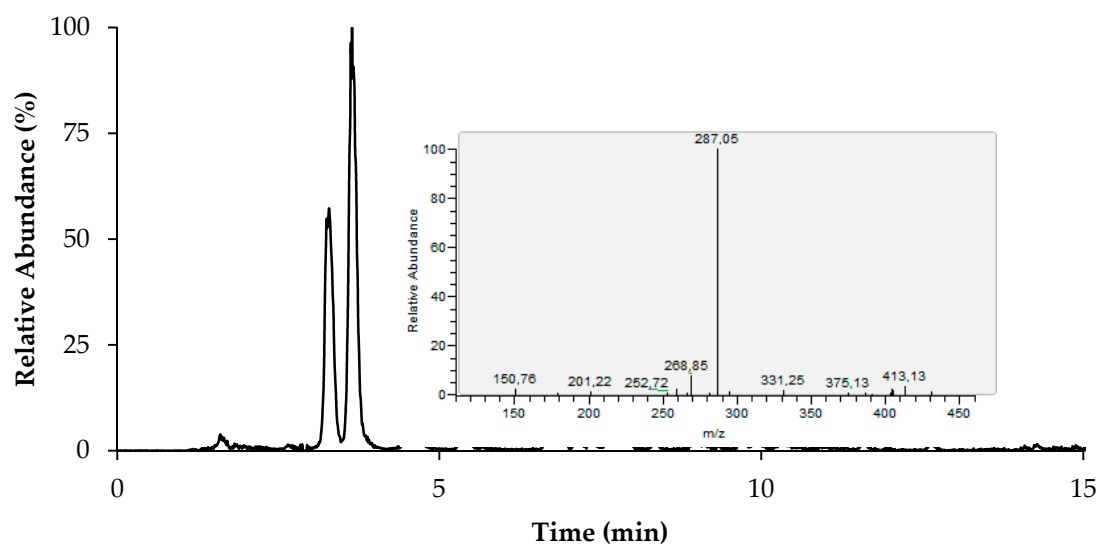

**Figure S2.** Extracted ion chromatograms and (inset) mass spectrum of ESI-MS<sup>2</sup> of the corresponded ion of main phenolic compounds identified in *Thymus zygis*, *Thymus pulegioides* and *Thymus fragrantissimus* by UHPLC-DAD-ESI-MS<sup>n</sup>
